# Supplementary material
Source: PubMed Central journal article supplement (PMC6499102)
Supplement: nxy319_supplemental_file.pdf [file nxy319_supplemental_file.pdf]

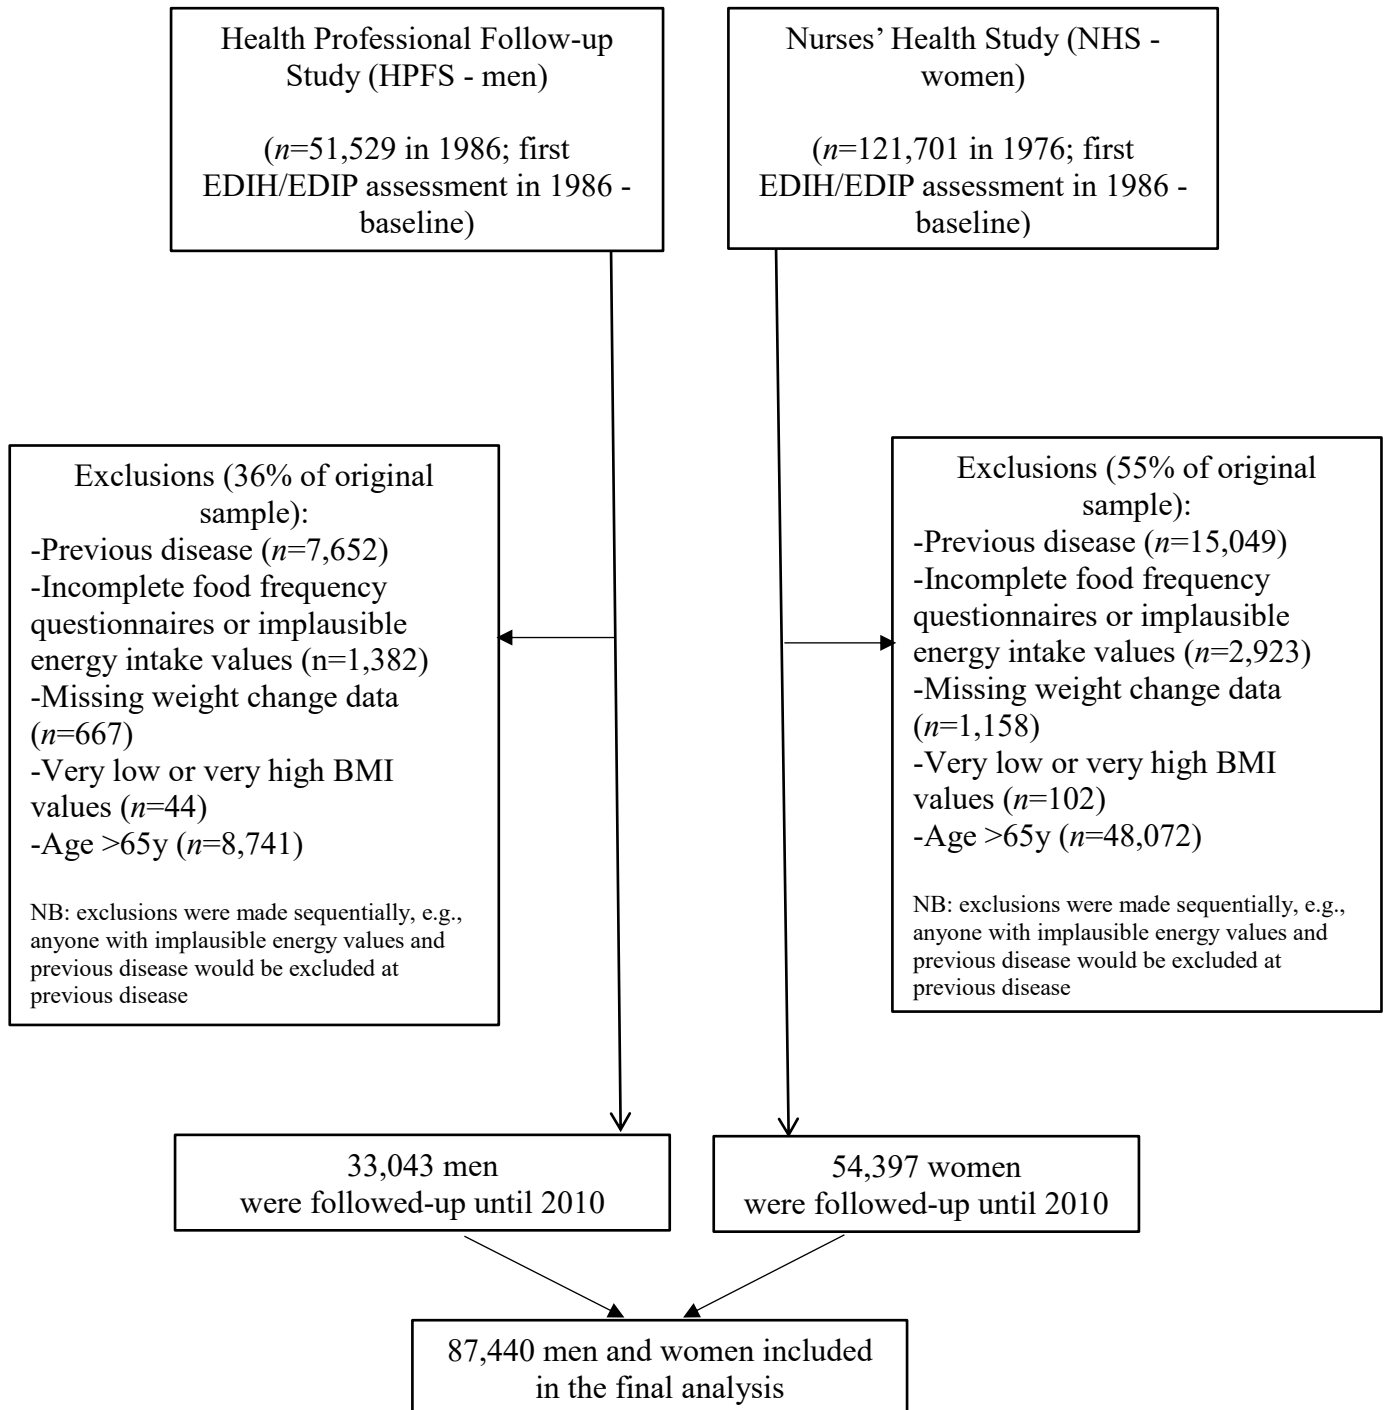

Supplemental Figure 1. Participant flow chart

Supplemental Table 1: Food items constituting the food group components of the empirical dietary index for hyperinsulinemia (EDIH) score and empirical dietary inflammatory pattern (EDIP) score and the food frequency questionnaire serving sizes

| Food group (servings/day)                                                                               | Dietary index |      | Food items and serving size                                                                                                                                                                                                                                     |
|---------------------------------------------------------------------------------------------------------|---------------|------|-----------------------------------------------------------------------------------------------------------------------------------------------------------------------------------------------------------------------------------------------------------------|
| <i>Food groups positively associated with plasma C-peptide (EDIH) or inflammatory biomarkers (EDIP)</i> |               |      |                                                                                                                                                                                                                                                                 |
| Processed meat                                                                                          | EDIH          | EDIP | 1 piece or 1 slice (25g) processed meats, 2 slices (25g) bacon, or 1 (50g) hot dog                                                                                                                                                                              |
| Red meat                                                                                                | EDIH          | EDIP | 4–6 oz (113–170g) beef, pork, or lamb, or 1 hamburger patty                                                                                                                                                                                                     |
| Organ meat                                                                                              | -             | EDIP | 4 oz (113 g) beef, calf, or pork liver; 1 oz (28.3 g) chicken or turkey liver                                                                                                                                                                                   |
| Low-energy sugary beverages                                                                             | EDIH          | EDIP | 1 glass (8 oz or 240mL), 1 bottle (20 oz or 600mL), or 1 can (12 oz or 360mL) low-energy cola; other low-energy carbonated beverages                                                                                                                            |
| High-energy sugary beverages                                                                            | EDIH          | EDIP | 1 glass (8 oz or 240mL), 1 bottle (20 oz or 600mL), or 1 can (12 oz or 360mL) cola with sugar; other carbonated beverages with sugar; or fruit punch drinks                                                                                                     |
| Margarine                                                                                               | EDIH          | -    | 1 (5g) pat margarine,                                                                                                                                                                                                                                           |
| Butter                                                                                                  | EDIH          | -    | 1 (5g) pat butter                                                                                                                                                                                                                                               |
| French fries                                                                                            | EDIH          | -    | 4-oz (113g) French fries                                                                                                                                                                                                                                        |
| Non-dark fish                                                                                           | EDIH          | EDIP | 3–5 oz (85–142g) canned tuna, shrimp, lobster, scallops, seafood other than dark fish                                                                                                                                                                           |
| Eggs                                                                                                    | EDIH          | -    | 1 egg                                                                                                                                                                                                                                                           |
| Low-fat dairy                                                                                           | EDIH          | -    | 8-oz (240mL) glass skimmed or low-fat milk, 1/2 cup sherbet or ice milk, 1 cup yogurt                                                                                                                                                                           |
| Cream soup                                                                                              | EDIH          | -    | 1 cup chowder or cream soup                                                                                                                                                                                                                                     |
| Tomatoes                                                                                                | EDIH          | EDIP | 1 fresh tomato, 1 small glass of tomato juice, or 1/2 cup (115 g) tomato sauce                                                                                                                                                                                  |
| Poultry                                                                                                 | EDIH          | -    | 4–6 oz (113–170g) chicken or turkey with or without skin                                                                                                                                                                                                        |
| Refined grains                                                                                          | -             | EDIP | 1 slice white bread, 1 English muffin, 1 bagel or roll, 1 muffin or biscuit, 1 cup (250g) white rice, 1 cup (140g) pasta, or 1 serving of pancakes or waffles                                                                                                   |
| Other vegetables                                                                                        | -             | EDIP | 4-inch (10.2 cm) stick celery, 1/2 cup fresh or cooked or 1 can mushrooms, 1/2 green pepper, 1 ear or 1/2 cup (90 g) frozen or canned corn, 1/2 cup (75 g) mixed vegetables, 1 eggplant, 1/2 cup (90 g) zucchini, 1/2 cup (16 g) alfalfa sprouts, or ¼ cucumber |
| <i>Food groups inversely associated with plasma C-peptide (EDIH) or inflammatory biomarker (EDIP)</i>   |               |      |                                                                                                                                                                                                                                                                 |
| Green leafy vegetables                                                                                  | EDIH          | EDIP | 1/2 cup spinach, 1 serving of iceberg or head lettuce, or 1 serving of romaine or leaf lettuce                                                                                                                                                                  |

## Supplementary Data

|                        |      |      |                                                                                                                                                                                                                                                                                                                                                        |
|------------------------|------|------|--------------------------------------------------------------------------------------------------------------------------------------------------------------------------------------------------------------------------------------------------------------------------------------------------------------------------------------------------------|
| Dark-yellow vegetables | -    | EDIP | 1/2 cup carrots, 1/2 cup yellow (winter) squash, or 1/2 cup (100g) yams or sweet potatoes                                                                                                                                                                                                                                                              |
| Beer                   | -    | EDIP | 1 bottle, 1 glass, or 1 can of beer                                                                                                                                                                                                                                                                                                                    |
| Wine                   | EDIH | EDIP | 4-oz (113g) glass red or white wine                                                                                                                                                                                                                                                                                                                    |
| Tea                    | -    | EDIP | 1 cup tea (not herbal)                                                                                                                                                                                                                                                                                                                                 |
| Coffee                 | EDIH | EDIP | 1 cup coffee (regular or decaffeinated)                                                                                                                                                                                                                                                                                                                |
| High-fat dairy         | EDIH | -    | 8-oz glass (240mL) whole milk, cream, 1 tablespoon sour cream, 1/2 cup ice cream, 1 oz cream cheese, 1 oz or 1 slice other cheese                                                                                                                                                                                                                      |
| Whole fruit            | EDIH | -    | 1 oz or small pack raisins, 1/2 cup grapes, 1 avocado, 1 banana, 1/4 cantaloupe, 1 slice watermelon, 1 orange, 1 fresh apple or pear, 1/2 cup (112 g) canned grapefruit, 1/2 cup (100 g) strawberries or blueberries, 1 fresh or 1/2 cup (112 g) canned peaches, or 1 fresh or 1/2 cup (95 g) canned apricots or plums (1 oz = 28.3 g; 1/2 cup = 50 g) |
| Fruit juice            | -    | EDIP | 1 small glass apple juice or cider, orange juice, grapefruit juice, or other fruit juice                                                                                                                                                                                                                                                               |
| Pizza                  | -    | EDIP | 2 slices pizza                                                                                                                                                                                                                                                                                                                                         |
| Snacks                 | -    | EDIP | 1 small bag or 1 oz (28.3 g) popcorn, potato chips, corn chips; or 1 cracker                                                                                                                                                                                                                                                                           |

---

Supplemental Table 2: Multivariable-adjusted results for the associations between changes in dietary insulinemic and inflammatory potential and weight change (kg) over 4-year periods, stratified by selected characteristics among women<sup>1,2</sup>

|                                                           | Quintiles of 4-year changes in dietary index scores |                                    |                                 |                                  |                              | Per 1 SD increase | P-trend <sup>3</sup> | P-interaction. <sup>4</sup> |
|-----------------------------------------------------------|-----------------------------------------------------|------------------------------------|---------------------------------|----------------------------------|------------------------------|-------------------|----------------------|-----------------------------|
|                                                           | Quintile 1<br>High improvement                      | Quintile 2<br>Moderate improvement | Quintile 3<br>Relatively stable | Quintile 4<br>Moderate worsening | Quintile 5<br>High worsening |                   |                      |                             |
| <b>Empirical dietary index for hyperinsulinemia score</b> |                                                     |                                    |                                 |                                  |                              |                   |                      |                             |
| <b>Body mass index</b>                                    |                                                     |                                    |                                 |                                  |                              |                   |                      | <0.0001                     |
| <25 kg/m <sup>2</sup>                                     | -0.38 (-0.46, -0.30)                                | -0.21 (-0.29, -0.14)               | reference                       | 0.11 (0.03, 0.19)                | 0.33 (0.23, 0.41)            | 0.26 (0.24, 0.29) | <0.0001              |                             |
| ≥25 kg/m <sup>2</sup>                                     | -1.01 (-1.15, -0.88)                                | -0.41 (-0.54, -0.27)               | reference                       | 0.15 (0.01, 0.29)                | 0.53 (0.39, 0.67)            | 0.57 (0.52, 0.61) | <0.0001              |                             |
| <b>Physical activity<sup>5</sup></b>                      |                                                     |                                    |                                 |                                  |                              |                   |                      | 0.02                        |
| ≥median MET-/week                                         | -0.59 (-0.69, -0.48)                                | -0.28 (-0.38, -0.18)               | reference                       | 0.19 (0.09, 0.29)                | 0.43 (0.33, 0.53)            | 0.38 (0.34, 0.41) | <0.0001              |                             |
| <median MET-week                                          | -0.78 (-0.89, -0.66)                                | -0.31 (-0.42, -0.19)               | reference                       | 0.09 (-0.03, 0.20)               | 0.48 (0.36, 0.60)            | 0.46 (0.42, 0.50) | <0.0001              |                             |
| <b>Age</b>                                                |                                                     |                                    |                                 |                                  |                              |                   |                      | <0.0001                     |
| <55 years                                                 | -0.83 (-0.95, -0.71)                                | -0.37 (-0.49, -0.25)               | reference                       | 0.14 (0.02, 0.26)                | 0.52 (0.39, 0.64)            | 0.51 (0.47, 0.56) | <0.0001              |                             |
| ≥55 years                                                 | -0.55 (-0.65, -0.44)                                | -0.23 (-0.33, -0.13)               | reference                       | 0.17 (0.07, 0.27)                | 0.44 (0.35, 0.54)            | 0.36 (0.33, 0.39) | <0.0001              |                             |
| <b>Smoking status</b>                                     |                                                     |                                    |                                 |                                  |                              |                   |                      | 0.003                       |
| Ever smokers                                              | -0.66 (-0.77, -0.55)                                | -0.29 (-0.40, -0.18)               | reference                       | 0.17 (0.07, 0.28)                | 0.48 (0.38, 0.59)            | 0.41 (0.37, 0.44) | <0.0001              |                             |
| Never smokers                                             | -0.68 (-0.79, -0.57)                                | -0.30 (-0.41, -0.20)               | reference                       | 0.13 (0.02, 0.24)                | 0.44 (0.33, 0.55)            | 0.43 (0.39, 0.47) | <0.0001              |                             |
| <b>Baseline dietary insulinemic potential</b>             |                                                     |                                    |                                 |                                  |                              |                   |                      | <0.0001                     |
| <median                                                   | -0.47 (-0.60, -0.34)                                | -0.25 (-0.35, -0.14)               | reference                       | 0.18 (0.09, 0.28)                | 0.53 (0.44, 0.62)            | 0.37 (0.34, 0.41) | <0.0001              |                             |
| ≥median                                                   | -0.82 (-0.93, -0.71)                                | -0.33 (-0.44, -0.21)               | reference                       | 0.10 (-0.03, 0.22)               | 0.30 (0.14, 0.45)            | 0.48 (0.44, 0.52) | <0.0001              |                             |
| <b>Menopausal and hormone therapy (PMH) status</b>        |                                                     |                                    |                                 |                                  |                              |                   |                      | <0.0001                     |
| Premenopausal                                             | -0.83 (-0.97, -0.68)                                | -0.37 (-0.52, -0.23)               | reference                       | 0.06 (-0.08, 0.20)               | 0.54 (0.39, 0.68)            | 0.50 (0.45, 0.55) | <0.0001              |                             |
| Postmenopausal, and PMH never                             | -0.64 (-0.80, -0.47)                                | -0.25 (-0.41, -0.08)               | reference                       | 0.11 (-0.05, 0.27)               | 0.37 (0.21, 0.53)            | 0.37 (0.32, 0.43) | <0.0001              |                             |
| Postmenopausal and PMH ever                               | -0.50 (-0.60, -0.38)                                | -0.21 (-0.32, -0.10)               | reference                       | 0.23 (0.12, 0.34)                | 0.51 (0.39, 0.62)            | 0.37 (0.33, 0.41) | <0.0001              |                             |
| <b>Empirical dietary inflammatory pattern score</b>       |                                                     |                                    |                                 |                                  |                              |                   |                      |                             |
| <b>Body mass index</b>                                    |                                                     |                                    |                                 |                                  |                              |                   |                      | <0.0001                     |
| <25 kg/m <sup>2</sup>                                     | -0.19 (-0.27, -0.10)                                | -0.18 (-0.26, -0.10)               | reference                       | -0.04 (-0.12, 0.04)              | 0.15 (0.07, 0.23)            | 0.13 (0.10, 0.15) | <0.0001              |                             |
| ≥25 kg/m <sup>2</sup>                                     | -0.41 (-0.54, -0.27)                                | -0.19 (-0.33, -0.05)               | reference                       | -0.01 (-0.15, 0.13)              | 0.11 (-0.03, 0.25)           | 0.18 (0.13, 0.23) | <0.0001              |                             |
| <b>Physical activity<sup>5</sup></b>                      |                                                     |                                    |                                 |                                  |                              |                   |                      | 0.005                       |
| ≥median MET-/week                                         | -0.27 (-0.38, -0.17)                                | -0.19 (-0.29, -0.09)               | reference                       | -0.02 (-0.12, 0.08)              | 0.13 (0.03, 0.23)            | 0.14 (0.11, 0.18) | <0.0001              |                             |

|                                                    |                      |                      |           |                      |                    |                   |         |         |
|----------------------------------------------------|----------------------|----------------------|-----------|----------------------|--------------------|-------------------|---------|---------|
| <median MET-/week                                  | -0.32 (-0.44, -0.20) | -0.18 (-0.30, -0.07) | reference | -0.03 (-0.15, 0.09)  | 0.15 (0.03, 0.27)  | 0.16 (0.12, 0.20) | <0.0001 |         |
| <b>Age</b>                                         |                      |                      |           |                      |                    |                   |         | 0.047   |
| <55 years                                          | -0.36 (-0.48, -0.24) | -0.32 (-0.45, -0.20) | reference | -0.08 (-0.20, 0.04)  | 0.08 (-0.04, 0.21) | 0.19 (0.14, 0.23) | <0.0001 |         |
| ≥55 years                                          | -0.23 (-0.33, -0.13) | -0.05 (-0.15, 0.05)  | reference | 0.06 (-0.04, 0.16)   | 0.22 (0.12, 0.31)  | 0.14 (0.11, 0.17) | <0.0001 |         |
| <b>Smoking status</b>                              |                      |                      |           |                      |                    |                   |         | 0.03    |
| Ever smokers                                       | -0.30 (-0.41, -0.19) | -0.11 (-0.22, -0.01) | reference | -0.04 (-0.14, 0.07)  | 0.12 (0.01, 0.23)  | 0.14 (0.10, 0.17) | <0.0001 |         |
| Never smokers                                      | -0.26 (-0.37, -0.15) | -0.23 (-0.34, -0.12) | reference | -0.01 (-0.12, 0.10)  | 0.17 (0.06, 0.29)  | 0.17 (0.13, 0.21) | <0.0001 |         |
| <b>Baseline dietary inflammatory potential</b>     |                      |                      |           |                      |                    |                   |         | <0.0001 |
| <median                                            | -0.48 (-0.59, -0.37) | -0.23 (-0.33, -0.13) | reference | 0.15 (0.05, 0.25)    | 0.46 (0.36, 0.55)  | 0.33 (0.30, 0.36) | <0.0001 |         |
| ≥median                                            | -0.72 (-0.83, -0.61) | -0.32 (-0.43, -0.20) | reference | 0.11 (-0.01, 0.23)   | 0.32 (0.19, 0.45)  | 0.41 (0.37, 0.45) | <0.0001 |         |
| <b>Menopausal and hormone therapy (PMH) status</b> |                      |                      |           |                      |                    |                   |         | <0.0001 |
| Premenopausal                                      | -0.42 (-0.57, -0.28) | -0.39 (-0.53, -0.24) | reference | -0.21 (-0.35, -0.06) | 0.04 (-0.11, 0.19) | 0.17 (0.12, 0.23) | <0.0001 |         |
| Postmenopausal, and PMH never                      | -0.17 (-0.33, 0.00)  | -0.04 (-0.20, 0.12)  | reference | 0.01 (-0.15, 0.18)   | 0.22 (0.06, 0.39)  | 0.11 (0.06, 0.17) | <0.0001 |         |
| Postmenopausal and PMH ever                        | -0.24 (-0.36, -0.13) | -0.08 (-0.19, 0.04)  | reference | 0.08 (-0.03, 0.20)   | 0.20 (0.08, 0.31)  | 0.16 (0.12, 0.20) | <0.0001 |         |

<sup>1</sup>Values are weight change (95% confidence intervals) in kilograms. To convert kilograms to pounds, divide by 0.4536.

<sup>2</sup>Multivariable models were adjusted for: age (years, continuous), questionnaire cycle (4-year intervals), baseline total energy intake (kcal/d), changes in total energy intake (kcal/d), baseline dietary insulinemic or inflammatory potential at the beginning of each 4-year period, baseline BMI (kg/m<sup>2</sup>, continuous), baseline physical activity (MET/week, continuous), changes in physical activity (MET/week, continuous), baseline hours of sleep per day (≤6, 7, 8, and >8 hours), hours of sitting and watching TV per week (baseline only in NHS [0-1, 2-5, 6-20, 21-40, >40 hours]; and also 4-year change in HPFS [continuous]), 4-year change in alcohol consumption, 4-year change in smoking status (stayed never smoker, stayed former smoker, stayed current smoker, change from former to current smoker, change from never to current smoker, and change from current to former smoker), and among women only: baseline parity (0, 1-2, 3, 4+ children), menopausal status and postmenopausal hormone use (premenopausal, and postmenopausal never, current, past users). When stratifying by BMI, physical activity, age and baseline dietary insulinemic or inflammatory potential, we adjusted for the continuous variable within strata of the potential effect modifier, e.g., adjusting for continuous BMI among normal weight women.

<sup>3</sup>*P*-value for trend was the *P*-value of the 1 SD dietary score as a continuous variable in multivariable linear models.

<sup>4</sup>*P*-value for interaction was the Wald *P*-value of the interaction term.

<sup>5</sup>Median physical activity was 10.7 MET-hours/week

Supplemental Table 3: Multivariable-adjusted results for the associations between changes in dietary insulinemic and inflammatory potential and weight change (kg) over 4-year periods, stratified by selected characteristics among men<sup>1,2</sup>

|                                                           | Quintiles of 4-year changes in dietary index scores |                                    |                                 |                                  |                              | Per 1 SD increase | P-trend <sup>3</sup> | P-interaction <sup>4</sup> |
|-----------------------------------------------------------|-----------------------------------------------------|------------------------------------|---------------------------------|----------------------------------|------------------------------|-------------------|----------------------|----------------------------|
|                                                           | Quintile 1<br>High improvement                      | Quintile 2<br>Moderate improvement | Quintile 3<br>Relatively stable | Quintile 4<br>Moderate worsening | Quintile 5<br>High worsening |                   |                      |                            |
| <b>Empirical dietary index for hyperinsulinemia score</b> |                                                     |                                    |                                 |                                  |                              |                   |                      |                            |
| <b>Body mass index</b>                                    |                                                     |                                    |                                 |                                  |                              |                   |                      | <0.0001                    |
| <25 kg/m <sup>2</sup>                                     | -0.33 (-0.46, -0.20)                                | -0.16 (-0.29, -0.04)               | reference                       | 0.20 (-0.08, 0.33)               | 0.45 (0.32, 0.58)            | 0.27 (0.22, 0.31) | <0.0001              |                            |
| ≥25 kg/m <sup>2</sup>                                     | -0.82 (-0.99, -0.65)                                | -0.32 (-0.49, -0.15)               | reference                       | 0.08 (-0.09, 0.25)               | 0.46 (0.29, 0.63)            | 0.44 (0.39, 0.49) | <0.0001              |                            |
| <b>Physical activity<sup>5</sup></b>                      |                                                     |                                    |                                 |                                  |                              |                   |                      | 0.55                       |
| ≥median MET-h/week                                        | -0.53 (-0.67, -0.39)                                | -0.20 (-0.34, -0.07)               | reference                       | 0.27 (0.14, 0.41)                | 0.55 (0.42, 0.69)            | 0.37 (0.32, 0.41) | <0.0001              |                            |
| <median MET-h/week                                        | -0.66 (-0.82, -0.49)                                | -0.26 (-0.42, -0.09)               | reference                       | -0.05 (-0.11, 0.22)              | 0.42 (0.25, 0.58)            | 0.38 (0.33, 0.43) | <0.0001              |                            |
| <b>Age</b>                                                |                                                     |                                    |                                 |                                  |                              |                   |                      | <0.0001                    |
| <55 years                                                 | -0.72 (-0.87, -0.57)                                | -0.30 (-0.44, -0.15)               | reference                       | 0.21 (0.06, 0.36)                | 0.56 (0.41, 0.71)            | 0.44 (0.39, 0.49) | <0.0001              |                            |
| ≥55 years                                                 | -0.46 (-0.62, -0.30)                                | -0.21 (-0.37, -0.05)               | reference                       | 0.11 (-0.04, 0.27)               | 0.41 (0.26, 0.57)            | 0.30 (0.25, 0.35) | <0.0001              |                            |
| <b>Smoking status</b>                                     |                                                     |                                    |                                 |                                  |                              |                   |                      | 0.11                       |
| Ever smokers                                              | -0.49 (-0.67, -0.32)                                | -0.23 (-0.40, -0.05)               | reference                       | 0.17 (-0.003, 0.24)              | 0.51 (0.34, 0.68)            | 0.36 (0.31, 0.41) | <0.0001              |                            |
| Never smokers                                             | -0.67 (-0.81, -0.53)                                | -0.24 (-0.38, 0.11)                | reference                       | 0.14 (0.008, 0.28)               | 0.52 (0.38, 0.66)            | 0.40 (0.35, 0.44) | <0.0001              |                            |
| <b>Baseline dietary insulinemic potential</b>             |                                                     |                                    |                                 |                                  |                              |                   |                      | <0.0001                    |
| <median                                                   | -0.46 (-0.65, -0.27)                                | -0.25 (-0.40, -0.10)               | reference                       | 0.24 (0.10, 0.38)                | 0.56 (0.43, 0.70)            | 0.36 (0.32, 0.41) | <0.0001              |                            |
| ≥median                                                   | -0.70 (-0.85, -0.55)                                | -0.21 (-0.37, -0.04)               | reference                       | 0.08 (0.10, 0.35)                | 0.40 (0.19, 0.62)            | 0.41 (0.36, 0.46) | <0.0001              |                            |
| <b>Empirical dietary inflammatory pattern score</b>       |                                                     |                                    |                                 |                                  |                              |                   |                      |                            |
| <b>Body mass index</b>                                    |                                                     |                                    |                                 |                                  |                              |                   |                      | <0.0001                    |
| <25 kg/m <sup>2</sup>                                     | -0.01 (-0.15, 0.12)                                 | -0.05 (-0.18, 0.08)                | reference                       | 0.12 (-0.01, 0.25)               | 0.22 (0.09, 0.35)            | 0.09 (0.04, 0.14) | 0.0004               |                            |
| ≥25 kg/m <sup>2</sup>                                     | -0.27 (-0.44, -0.10)                                | -0.11 (-0.28, 0.06)                | reference                       | 0.03 (-0.14, 0.20)               | 0.19 (0.02, 0.37)            | 0.16 (0.09, 0.22) | <0.0001              |                            |
| <b>Physical activity<sup>5</sup></b>                      |                                                     |                                    |                                 |                                  |                              |                   |                      | 0.09                       |
| ≥median MET-h/week                                        | -0.20 (-0.35, -0.06)                                | -0.19 (-0.33, -0.05)               | reference                       | 0.06 (-0.08, 0.20)               | 0.17 (0.03, 0.31)            | 0.13 (0.08, 0.18) | <0.0001              |                            |
| <median MET-h/week                                        | -0.17 (-0.34, -0.01)                                | 0.09 (-0.07, 0.26)                 | reference                       | 0.08 (-0.09, 0.25)               | 0.26 (0.09, 0.43)            | 0.15 (0.09, 0.21) | <0.0001              |                            |
| <b>Age</b>                                                |                                                     |                                    |                                 |                                  |                              |                   |                      | 0.33                       |
| <55 years                                                 | -0.20 (-0.35, -0.04)                                | -0.06 (-0.21, 0.09)                | reference                       | 0.09 (-0.06, 0.24)               | 0.31 (0.16, 0.47)            | 0.16 (0.11, 0.22) | <0.0001              |                            |
| ≥55 years                                                 | -0.10 (-0.26, 0.06)                                 | -0.07 (-0.22, 0.09)                | reference                       | 0.06 (-0.10, 0.22)               | 0.17 (0.01, 0.33)            | 0.12 (0.06, 0.18) | <0.0001              |                            |
| <b>Smoking status</b>                                     |                                                     |                                    |                                 |                                  |                              |                   |                      | 0.36                       |
| Ever smokers                                              | 0.04 (-0.14, 0.22)                                  | -0.01 (-0.19, 0.17)                | reference                       | 0.14 (-0.03, 0.32)               | 0.38 (0.21, 0.55)            | 0.12 (0.05, 0.18) | 0.0004               |                            |

|                                                |                      |                      |           |                    |                    |                   |         |         |
|------------------------------------------------|----------------------|----------------------|-----------|--------------------|--------------------|-------------------|---------|---------|
| Never smokers                                  | -0.34 (-0.48, -0.20) | -0.13 (-0.27, 0.01)  | reference | 0.05 (-0.10, 0.19) | 0.13 (-0.01, 0.28) | 0.18 (0.12, 0.23) | <0.0001 |         |
| <b>Baseline dietary inflammatory potential</b> |                      |                      |           |                    |                    |                   |         | <0.0001 |
| <median                                        | -0.38 (-0.53, -0.22) | -0.18 (-0.33, -0.03) | reference | 0.23 (0.08, 0.37)  | 0.58 (0.44, 0.72)  | 0.33 (0.28, 0.37) | <0.0001 |         |
| ≥median                                        | -0.64 (-0.80, -0.49) | -0.22 (-0.38, -0.06) | reference | 0.05 (-0.12, 0.21) | 0.23 (0.03, 0.40)  | 0.31 (0.26, 0.36) | <0.0001 |         |

<sup>1</sup>Values are weight change (95% confidence intervals) in kilograms. To convert kilograms to pounds, divide by 0.4536.

<sup>2</sup>Multivariable models were adjusted for: age (years, continuous), questionnaire cycle (4-year intervals), baseline total energy intake (kcal/d), changes in total energy intake (kcal/d), baseline dietary insulinemic or inflammatory potential at the beginning of each 4-year period, baseline BMI (kg/m<sup>2</sup>, continuous), baseline physical activity (MET/week, continuous), changes in physical activity (MET/week, continuous), baseline hours of sleep per day (≤6, 7, 8, and >8 hours), hours of sitting and watching TV per week (baseline only in NHS [0-1, 2-5, 6-20, 21-40, >40 hours]; and also 4-year change in HPFS [continuous]), 4-year change in alcohol consumption, 4-year change in smoking status (stayed never smoker, stayed former smoker, stayed current smoker, change from former to current smoker, change from never to current smoker, and change from current to former smoker). When stratifying by BMI, physical activity, age and baseline dietary insulinemic or inflammatory potential, we adjusted for the continuous variable within strata of the potential effect modifier, e.g., adjusting for continuous BMI among normal weight men.

<sup>3</sup>*P*-value for trend was the *P*-value of the 1 SD dietary score as a continuous variable in multivariable linear models.

<sup>4</sup>*P*-value for interaction was the Wald *P*-value of the interaction term.

<sup>5</sup>Median physical activity was 20.8 MET-hours/week
